# Supplementary material for: Capturing Salmonella SspH2 Host Targets in Virus-Like Particles
Source: Front Med (Lausanne). 2021 Sep 8;8:725072. doi: 10.3389/fmed.2021.725072 (PMC8455821; doi:10.3389/fmed.2021.725072)
Supplement: Supplementary Table 2 — Virotrap Gag-SspH2 co-enriched significant hits (p<0.05) using Limma. [file Table_2.XLSX]

## Sheet: Table_S2
				Imputed data used by Limma				Non-imputed data				On imputed data
T: Protein names	MS/MS count	T: Gene names	T: Majori protein IDs	SspH2_1	SspH2_2	eDHFR_1	eDHFR_2	SspH2_1	SspH2_2	eDHFR_1	eDHFR_2	LogFC(SspH2/eDHFR)	N: P.Value	T: Protein IDs	T: Fasta headers
Actin, cytoplasmic 2;Actin, cytoplasmic 2, N-terminally processed;Actin, cytoplasmic 1;Actin, cytoplasmic 1, N-terminally processed	84	ACTG1;ACTB	P63261;P60709	27,4279	28,2801	26,152	26,3256	27,4279	28,2801	26,152	26,3256	1,61516	0,00787903	P63261;P60709;Q6S8J3;A5A3E0;P0CG38;Q562R1;P0CG39;Q9BYX7	sp|O75190|DNJB6_HUMAN DnaJ homolog subfamily B member 6 OS=Homo sapiens OX=9606 GN=DNAJB6 PE=1 SV=2
BRO1 domain-containing protein BROX	41	BROX	Q5VW32	25,4682	24,9554	24,0939	24,0233	25,4682	24,9554	24,0939	24,0233	1,15326	0,00925097	Q5VW32	sp|P04792|HSPB1_HUMAN Heat shock protein beta-1 OS=Homo sapiens OX=9606 GN=HSPB1 PE=1 SV=2
Charged multivesicular body protein 1a	6	CHMP1A	Q9HD42	22,5009	22,1386	21,4736	19,9998	22,5009	22,1386	21,4736	19,9998	1,58303	0,038964	Q9HD42	sp|P07737|PROF1_HUMAN Profilin-1 OS=Homo sapiens OX=9606 GN=PFN1 PE=1 SV=2
Charged multivesicular body protein 3	8	CHMP3	Q9Y3E7	21,751	21,9508	21,3075	21,1249	21,751	21,9508	21,3075	21,1249	0,634698	0,0375118	Q9Y3E7	sp|P07900|HS90A_HUMAN Heat shock protein HSP 90-alpha OS=Homo sapiens OX=9606 GN=HSP90AA1 PE=1 SV=5
Protein diaphanous homolog 1	25	DIAPH1	O60610	21,8929	25,1365	19,1567	18,9525	21,8929	25,1365	19,1567	18,9525	4,46013	0,0128498	O60610;Q8IUG5	sp|P07948|LYN_HUMAN Tyrosine-protein kinase Lyn OS=Homo sapiens OX=9606 GN=LYN PE=1 SV=3;sp|P08631|HCK_HUMAN Tyrosine-protein kinase HCK OS=Homo sapiens OX=9606 GN=HCK PE=1 SV=5
DnaJ homolog subfamily B member 6	6	DNAJB6	O75190	21,9028	22,4015	18,3837	17,0835	21,9028	22,4015	NaN	NaN	4,41854	0,000590433	O75190;Q8WWF6;Q8NHS0;P25686	sp|P08195|4F2_HUMAN 4F2 cell-surface antigen heavy chain OS=Homo sapiens OX=9606 GN=SLC3A2 PE=1 SV=3
Protein enabled homolog	17	ENAH	Q8N8S7	22,0737	24,4903	19,2729	18,4707	22,0737	24,4903	19,2729	NaN	4,41021	0,00556191	Q8N8S7	sp|P08238|HS90B_HUMAN Heat shock protein HSP 90-beta OS=Homo sapiens OX=9606 GN=HSP90AB1 PE=1 SV=4
Formin-like protein 2;Formin-like protein 3	2	FMNL2;FMNL3	Q96PY5;Q8IVF7	19,794	19,9308	17,1899	18,7063	19,794	19,9308	NaN	18,7063	1,91429	0,0210899	Q96PY5;Q8IVF7	sp|P31948|STIP1_HUMAN Stress-induced-phosphoprotein 1 OS=Homo sapiens OX=9606 GN=STIP1 PE=1 SV=1
Heat shock protein HSP 90-alpha	74	HSP90AA1	P07900	25,3742	26,182	24,6303	24,6392	25,3742	26,182	24,6303	24,6392	1,14336	0,0228407	P07900;Q14568;Q58FG0	sp|P35080|PROF2_HUMAN Profilin-2 OS=Homo sapiens OX=9606 GN=PFN2 PE=1 SV=3
Heat shock protein HSP 90-beta	76	HSP90AB1	P08238	25,7652	26,1212	24,6942	24,7247	25,7652	26,1212	24,6942	24,7247	1,23377	0,00432296	P08238;Q58FF7;Q58FF6;Q58FG1	sp|P53990|IST1_HUMAN IST1 homolog OS=Homo sapiens OX=9606 GN=IST1 PE=1 SV=1
Heat shock protein beta-1	6	HSPB1	P04792	21,7915	22,4984	20,6761	20,9562	21,7915	22,4984	20,6761	20,9562	1,3288	0,0117164	P04792	sp|P63261|ACTG_HUMAN Actin, cytoplasmic 2 OS=Homo sapiens OX=9606 GN=ACTG1 PE=1 SV=1;sp|P60709|ACTB_HUMAN Actin, cytoplasmic 1 OS=Homo sapiens OX=9606 GN=ACTB PE=1 SV=1
IST1 homolog	61	IST1	P53990	25,1946	25,5699	23,9317	23,745	25,1946	25,5699	23,9317	23,745	1,54392	0,0021404	P53990	sp|P61026|RAB10_HUMAN Ras-related protein Rab-10 OS=Homo sapiens OX=9606 GN=RAB10 PE=1 SV=1
Kin of IRRE-like protein 1	6	KIRREL	Q96J84	20,7844	20,529	19,8973	19,9088	20,7844	20,529	19,8973	19,9088	0,753662	0,0206426	Q96J84	sp|Q01650|LAT1_HUMAN Large neutral amino acids transporter small subunit 1 OS=Homo sapiens OX=9606 GN=SLC7A5 PE=1 SV=2
Tyrosine-protein kinase Lyn;Tyrosine-protein kinase HCK	4	LYN;HCK	P07948;P08631	19,5742	19,8701	18,2084	16,2087	19,5742	19,8701	NaN	NaN	2,5136	0,0198515	P07948;P08631	sp|Q5VW32|BROX_HUMAN BRO1 domain-containing protein BROX OS=Homo sapiens OX=9606 GN=BROX PE=1 SV=1
MIT domain-containing protein 1	23	MITD1	Q8WV92	23,8846	23,5655	22,2744	22,296	23,8846	23,5655	22,2744	22,296	1,43979	0,00208287	Q8WV92	sp|Q68D85|NR3L1_HUMAN Natural cytotoxicity triggering receptor 3 ligand 1 OS=Homo sapiens OX=9606 GN=NCR3LG1 PE=1 SV=1
Natural cytotoxicity triggering receptor 3 ligand 1	5	NCR3LG1	Q68D85	21,6909	21,8342	20,8129	20,718	21,6909	21,8342	20,8129	20,718	0,99712	0,00627276	Q68D85	sp|Q6PHR2|ULK3_HUMAN Serine/threonine-protein kinase ULK3 OS=Homo sapiens OX=9606 GN=ULK3 PE=1 SV=2
Profilin-1	40	PFN1	P07737	26,9922	27,6783	22,6768	22,7576	26,9922	27,6783	22,6768	22,7576	4,61802	5,37032E-05	P07737;CON__P02584	sp|Q8IX04|UEVLD_HUMAN Ubiquitin-conjugating enzyme E2 variant 3 OS=Homo sapiens OX=9606 GN=UEVLD PE=1 SV=2
Profilin-2	6	PFN2	P35080	22,6069	22,939	16,5562	18,1631	22,6069	22,939	NaN	NaN	5,41332	0,000456965	P35080	sp|Q8N8S7|ENAH_HUMAN Protein enabled homolog OS=Homo sapiens OX=9606 GN=ENAH PE=1 SV=2
Ras-related protein Rab-10	34	RAB10	P61026	24,1209	23,8936	23,1521	23,1496	24,1209	23,8936	23,1521	23,1496	0,856388	0,0123601	P61026;P59190	sp|Q8WV92|MITD1_HUMAN MIT domain-containing protein 1 OS=Homo sapiens OX=9606 GN=MITD1 PE=1 SV=1
Syntenin-1	168	SDCBP	O00560	29,2359	28,9058	28,2769	28,1475	29,2359	28,9058	28,2769	28,1475	0,858623	0,016671	O00560	sp|Q96J84|KIRR1_HUMAN Kin of IRRE-like protein 1 OS=Homo sapiens OX=9606 GN=KIRREL1 PE=1 SV=2
Thiamine transporter 1	2	SLC19A2	O60779	21,9513	22,0102	17,6443	18,3673	21,9513	22,0102	NaN	NaN	3,97492	0,000117019	O60779	sp|Q96PY5|FMNL2_HUMAN Formin-like protein 2 OS=Homo sapiens OX=9606 GN=FMNL2 PE=1 SV=3;sp|Q8IVF7|FMNL3_HUMAN Formin-like protein 3 OS=Homo sapiens OX=9606 GN=FMNL3 PE=1 SV=3
4F2 cell-surface antigen heavy chain	120	SLC3A2	P08195	26,6269	26,6068	26,1009	25,9915	26,6269	26,6068	26,1009	25,9915	0,570645	0,0408207	P08195	sp|Q9HD42|CHM1A_HUMAN Charged multivesicular body protein 1a OS=Homo sapiens OX=9606 GN=CHMP1A PE=1 SV=1
Large neutral amino acids transporter small subunit 1	25	SLC7A5	Q01650	23,249	23,7077	22,8389	22,7347	23,249	23,7077	22,8389	22,7347	0,691555	0,0460724	Q01650;Q9UM01;Q92536	sp|Q9NNW5|WDR6_HUMAN WD repeat-containing protein 6 OS=Homo sapiens OX=9606 GN=WDR6 PE=1 SV=1
Salmonella secreted protein H2	473	SspH2	tr|A0A0H3NF38|A0A0H3NF38_SALTS	31,0612	30,8355	23,9401	25,2251	31,0612	30,8355	23,9401	25,2251	6,36573	9,72313E-05	tr|A0A0H3NF38|A0A0H3NF38_SALTS	sp|O00560|SDCB1_HUMAN Syntenin-1 OS=Homo sapiens OX=9606 GN=SDCBP PE=1 SV=1
Stress-induced-phosphoprotein 1	23	STIP1	P31948	23,5114	24,3531	22,5719	22,472	23,5114	24,3531	22,5719	22,472	1,41027	0,0122178	P31948	sp|Q9Y3E7|CHMP3_HUMAN Charged multivesicular body protein 3 OS=Homo sapiens OX=9606 GN=CHMP3 PE=1 SV=3
Ubiquitin-conjugating enzyme E2 variant 3	2	UEVLD	Q8IX04	19,6836	20,0317	17,4888	18,549	19,6836	20,0317	NaN	NaN	1,83876	0,00966472	Q8IX04	tr|A0A0H3NF38|A0A0H3NF38_SALTS RING-type E3 ubiquitin transferase OS=Salmonella typhimurium (strain SL1344) OX=216597 GN=sspH2 PE=1 SV=1
Serine/threonine-protein kinase ULK3	2	ULK3	Q6PHR2	19,1528	19,4704	17,7888	18,0135	19,1528	19,4704	NaN	NaN	1,41047	0,00279846	Q6PHR2	sp|O60610|DIAP1_HUMAN Protein diaphanous homolog 1 OS=Homo sapiens OX=9606 GN=DIAPH1 PE=1 SV=2
WD repeat-containing protein 6	10	WDR6	Q9NNW5	21,7541	21,2895	20,7776	20,8623	21,7541	21,2895	20,7776	20,8623	0,701792	0,0442724	Q9NNW5	sp|O60779|S19A2_HUMAN Thiamine transporter 1 OS=Homo sapiens OX=9606 GN=SLC19A2 PE=1 SV=2
